Development 133, 2447 (2006) doi:10.1242/dev.02434

**Dkk2 plays an essential role in the corneal fate of the ocular surface epithelium**  
**Mahua Mukhopadhyay, Marat Gorivodsky, Svetlana Shtrom, Alexander Grinberg, Christoph Niehrs, Maria I. Morasso and Heiner Westphal** *Development* **133**, 2149-2154.

An error in this paper was not corrected before the article went to press.

Morasso and Westphal are co-senior authors on this work, rather than equal contributors.

We apologise to the authors and readers for this mistake.
